# Supplementary material for: Colombian Essential oil of Ruta Graveolens Against Candida sp. Isolated from the Oral Cavity of Patients with Head and Neck Cancer
Source: Preprints.org preprint supplement (doi:10.20944/preprints202103.0147.v1), 2021-03-04
Supplement: Supplementary file 1 [file supplementary]

Supplementary Materials

Article

Colombian essential oil of *Ruta graveolens* against *Candida* sp. isolated from the oral cavity of patients with head and neck cancer

Matthew Gavino Donadu1‡, Yeimmy Peralta-Ruiz2,3‡, Donatella Usai4, Francesca Maggio*2,Davide Rizzo5, Francesco Bussu5, Salvatore Rubino4, Stefania Zanetti4, Antonello Paparella2, Clemencia Chaves Lopez*2

**Table S1.** Main volatile compounds identified in Ruta graveolens essential oil.

| **Compound** | **%** | **Functional groups** | **%** |
| --- | --- | --- | --- |
| 2- undecanone | 42.6 | Ketones | 78.7 |
| 2-nonanone | 23.5 | Sesquiterpenes | 5.6 |
| 2-decanone | 4.0 | Alcohols | 4.2 |
| 2-nonanol | 3.0 | Esters | 4.8 |
| 2-dodecanone | 2.9 | Sesquiterpenoids | 1.3 |
| Isodecanone | 2.6 | Furanocoumarins | 1.4 |
| 2-tridecanone | 2.5 | Monoterpene ketones | 0.3 |
| Benzyl acetate | 1.7 | Total unidentified components | 3.7 |
| 1-Methylheptyl acetate | 1.3 |  |  |
| 2-Undecanol | 1.1 |  |  |
| Humulene | 1.1 |  |  |
| (-)-Aromadendrene | 0.9 |  |  |
| *trans*-β-Caryophyllene | 0.8 |  |  |
| Viridiflorol | 0.8 |  |  |
| Nonyl acetate | 0.7 |  |  |
| Benzyl 2-hydroxybenzoate | 0.5 |  |  |
| σ-cadinene | 0.5 |  |  |
